# Supplementary material for: The Cholesterol-Lowering Effect of Capsella Bursa-Pastoris Is Mediated via SREBP2 and HNF-1α-Regulated PCSK9 Inhibition in Obese Mice and HepG2 Cells
Source: MDPI journal article supplement (doi:10.3390/foods10020408), 2021-02-12
Supplement: s1 [file s1]

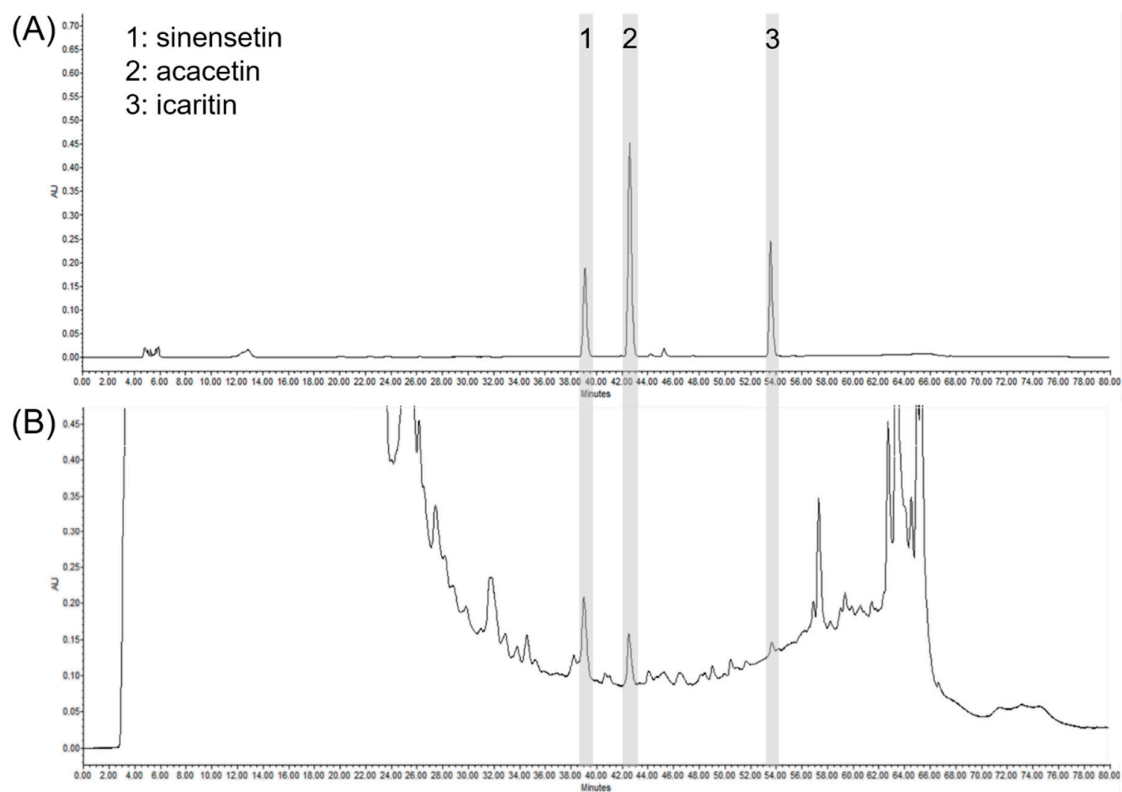

Figure 1. High performance liquid chromatography chromatograms of reference standards (A) and *Capsella bursa-pastoris* ethanol extract (B).

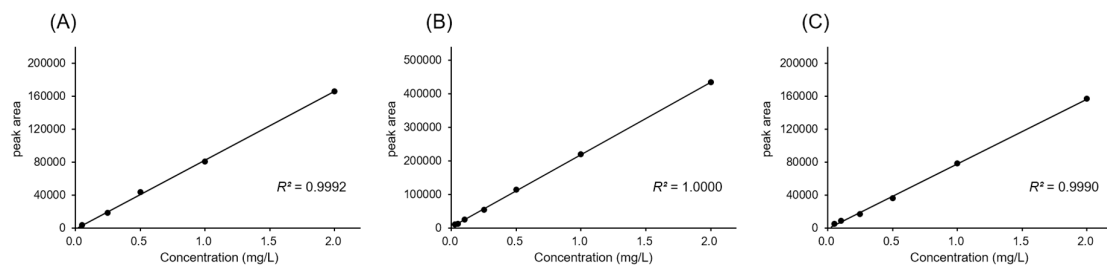

Figure 2. Standard curves used for quantitation of sinensetin (A), acacetin (B), and icaritin (C).
